# Supplementary material for: Mediterraneibacter catenae SW178 sp. nov., an intestinal bacterium of feral chicken
Source: PeerJ. 2021 Apr 27;9:e11050. doi: 10.7717/peerj.11050 (PMC8086573; doi:10.7717/peerj.11050)
Supplement: Supplemental Information 1 [file peerj-09-11050-s001.xlsx]

## Sheet: COGs_SW178_revision
Supplemental Table S1: Functional categories (COGs) from genome of strain SW178.
	Number of COGs
Funational cetagory	SW178	Mediterraneibacter torques	Mediterraneibacter bytyricigenes	Mediterraneibacter glycyrrhizinilyticus	Mediterraneibacter massiliensis	Mediterraneibacter faecis	Mediterraneibacter lactaris	Faecalicatena contorta	Faecalicatena orotica
Amino Acids and Derivatives	196	169	174	198	193	249	190	256	279
Carbohydrates	173	116	208	191	209	241	140	333	366
Cell Division and Cell Cycle	3	5	4	4	5	5	4	5	4
Cell Wall and Capsule	39	27	36	39	23	62	25	50	69
Cofactors, Vitamins, Prosthetic Groups, Pigments	99	100	107	90	104	127	96	115	114
DNA Metabolism	69	65	71	79	70	103	74	91	81
Dormancy and Sporulation	17	23	10	12	8	23	8	8	10
Fatty Acids, Lipids, and Isoprenoids	29	27	51	43	41	39	26	35	63
Iron acquisition and metabolism	0	9	0	0	0	22	0	0	9
Membrane Transport	23	22	15	40	26	16	10	29	46
Metabolism of Aromatic Compounds	2	2	2	2	5	3	3	3	5
Miscellaneous	4	4	6	2	7	15	4	4	10
Motility and Chemotaxis	0	1	0	13	0	0	0	5	7
Nitrogen Metabolism	6	9	7	9	8	15	6	10	8
Nucleosides and Nucleotides	63	49	68	93	64	100	45	79	83
Phages, Prophages, Transposable elements, Plasmids	1	8	10	6	11	7	8	20	5
Phosphorus Metabolism	27	19	6	26	8	13	12	13	10
Potassium metabolism	2	1	5	7	4	2	5	6	6
Protein Metabolism	174	147	156	147	158	203	173	147	161
Regulation and Cell signaling	12	11	9	9	2	8	12	8	8
Respiration	48	38	36	40	56	71	28	66	54
RNA Metabolism	42	41	42	53	42	62	40	50	47
Secondary Metabolism	4	4	4	5	0	5	4	4	5
Stress Response	21	6	14	5	6	16	4	19	8
Sulfur Metabolism	5	4	2	3	4	3	2	6	4
Virulence, Disease and Defense	51	38	46	56	47	79	46	71	76
